1  
2  
3  
4  
5  
6  
7  
8  
9

10 Natural variation in hyperosmotic stress responses of budding yeast

11  
12  
13  
14  
15  
16  
17

18 Yoshikazu Hirate<sup>1</sup>, Samuel Bottani<sup>3</sup> and Suzannah Rutherford<sup>1</sup>

19

20 1 Fred Hutchinson Cancer Research Center, Seattle, WA, 2 Laboratoire Matière et Systèmes  
21 Complex, Paris Diderot, Paris, France

22 **Abstract**

23 Rapid cell division defines evolutionary fitness for microorganisms but can be lethal during stress.  
24 Cells stop dividing under osmotic imbalance while adjusting their internal turgor pressure to the  
25 environment. Here we describe trade-offs between osmotic stress signaling, survival, and  
26 proliferation in a synthetic population of 50, ecologically distinct budding yeast. During rapid  
27 growth strong signaling predicted survival. Weak signaling predicted low viability, intense  
28 rebound signaling, and robust recovery. By contrast older cultures survived and adapted to  
29 unprecedented osmotic stress with fitness depending on reproducible, strain-specific proportions  
30 of cells with divergent signaling strategies. The most 'cautious' cells survived extreme stress  
31 without dividing; the most 'reckless' cells attempted to divide too soon and failed, killing both  
32 mother and daughter. A simple model with heritable proportions of cautious and reckless cells  
33 generates tunable, rapidly diversifying bet hedging strategies that resemble natural variation and  
34 would evolve in response to different patterns of osmotic stress.

35 Classical evolutionary models assign fitness directly to genotypes, mutations, and mean trait  
36 values without consideration of the genotype-phenotype map. Yet labyrinthine developmental  
37 mechanisms, which are themselves controlled by genetic variation, translate genotypes into  
38 phenotypes with a variable fidelity that determines whether and how heritable differences  
39 translate into fitness differences<sup>1</sup>. The mapping between genetic variation and the spectrum of  
40 attributes and behaviors upon which selection acts defines population-level properties such as  
41 the capacity to evolve (evolvability), the capacity to withstand genetic and environmental  
42 perturbation (robustness or canalization), and the optimization, within a given genotype, of  
43 phenotypic responses across different environments (reaction norms)<sup>2</sup>. Mapping the effects of  
44 natural genetic variation on mechanisms of development and the expression of phenotypic  
45 variation is needed to understand the evolutionary trajectories of populations and species. Here  
46 we describe strain-specific differences in hyperosmotic stress responsive signaling and  
47 associated behaviors in a synthetic population of budding yeast.

48 The high osmolarity glycerol (HOG) signaling pathway is central to an elaborate stress  
49 response that reduces cellular damage and death in unpredictably changing osmotic  
50 environments when the balance between external solutes and free water pressure in the cell can  
51 change suddenly<sup>3</sup>. A main function of the HOG pathway is the production and accumulation of  
52 intracellular glycerol, which restores water balance and, as demonstrated by a large body of work  
53 from many labs, is essential for survival, adaptation and proliferation in hyperosmotic stress<sup>3-8</sup>.  
54 In the wild, yeast and other microorganisms must balance their immediate survival against  
55 evolutionary fitness. Multiplicative fitness favors clonal populations that respond as rapidly as  
56 possible to improved conditions with earlier cell cycle reentry and proliferation<sup>9</sup>. On the other  
57 hand, individual survival requires that cells carefully sense the amplitude and direction of  
58 environmental change to more safely reenter the cell cycle after stress<sup>6</sup>. The HOG pathway  
59 consists of at least two highly-conserved, multi-component osmotic stress sensors linked to a  
60 parallel series of at least 15 kinases and accessory proteins that ultimately alter the activity of  
61 nearly 10% of the yeast genome<sup>3,5</sup>. The sheer numbers of genes involved, their conservation and  
62 their elaborate circuitry suggest that a nuanced response to osmotic stress has been crucial and  
63 strongly selected throughout evolutionary history. The hyperosmotic stress response has  
64 well-characterized and accessible signaling and phenotypic traits that can be measured in the  
65 lab and are almost certainly under strong selection in nature<sup>3,5,6</sup> making osmotic stress  
66 responses of budding yeast ideal for characterizing the mapping between signaling and behavior  
67 in a diverse population.

68 We measured osmotic stress signaling, survival and adaptation in exponentially  
69 growing and nearly quiescent cultures of diploid yeast<sup>10</sup>. Glycerol-3-phosphate dehydrogenase  
70 (*GPD1*) is a rate-limiting enzyme in glycerol production<sup>11</sup>. We used the synthesis and  
71 accumulation of green fluorescent protein (GFP) integrated into the *GPD1* gene (*GPD1::GFP*) as  
72 a proxy for HOG pathway activity. A synthetic population of diverse yeast genotypes was made  
73 by crossing *GPD1::GFP* in the genetic background of a standard laboratory strain (BY4742 Mat

74 alpha) to a panel of wild and industrial genetic backgrounds –e.g. fifty diverse haploids of the  
75 opposite mating type extracted from globally diverse, sequence-validated *Saccharomyces*  
76 *cerivisiae* diploid strains deposited to the collection of the Royal Netherlands Academy of Arts  
77 and Sciences over the past 100 years (CBS; Table 1 and Table S1).

78

### 79 **HOG signaling and behavior in young cultures**

80 We followed the behavior of single cells before and after their exposure to osmotic stress using  
81 time-lapse video microscopy of monolayer cultures in custom microfluidics devices<sup>12</sup>. When cells  
82 in exponential growth were exposed to sudden hyperosmotic stress, cell volume decreased, cell  
83 division and budding immediately stopped, and daughter cells retracted<sup>13</sup>. After a lag period  
84 proportional to the severity of the stress GFP fluorescence driven by the *GPD1* promoter began  
85 to accumulate in the cytoplasm of surviving cells. Cells that did not accumulate *GPD1::GFP* to  
86 high levels did not survive or adapt, developed large vacuoles, and began to die, remaining in  
87 view as shrunken cell ghosts. As GFP accumulated to saturation levels in the surviving cells,  
88 they adapted to the higher osmotic pressure, resumed cell division, budded and began to divide  
89 with a longer half time, producing daughter cells with similarly high fluorescence<sup>13</sup>.

90 Viability per culture and *GPD1::GFP* accumulation per cell were measured using flow  
91 cytometry of statistically large numbers of cells from all 50 strains (~10,000 cells / sample; Figure  
92 S1). The rate and extent of mean *GPD1::GFP* accumulation in exponentially growing cultures  
93 exposed to hyperosmotic media depended on the severity of the stress and the genetic  
94 background of each strain (Figure 1A). Prior to the osmotic stress mean *GPD1::GFP*  
95 fluorescence and viability were uncorrelated. After 2 hours in moderate 0.75 M KCl viability  
96 decreased and became steeply correlated with accumulated *GPD1::GFP* (Figure 1B and C). As  
97 expected natural variation in the strength of HOG signaling was directly responsible for variation  
98 among the strains in osmotic stress survival.

99

### 100 **Negative feedback drives robust recovery**

101 The initially strong positive correlation between variation in *GPD1::GFP* accumulation and  
102 variation in viability reversed as cells adapted and began to divide (Figure 1C; 4 hours). This  
103 distinguished two phases of the response, an early phase (0 – 2 hours) when viability decreased  
104 markedly and acute HOG signaling promoted osmotic stress survival and a later phase (2 – 4  
105 hours) when viability recovered but became negatively correlated with HOG signaling and  
106 *GPD1::GFP* accumulation. The switch from positive to negative correlations might have indicated  
107 that stronger HOG signaling, initially beneficial, suddenly caused lower viability. However  
108 negative feedback controls are present in the osmotic stress response at many levels and  
109 timescales. For example, (1) unequal water pressures activate osmotic stress sensors, glycerol  
110 channels and other pressure-sensitive components that return to baseline when water balance is  
111 restored (e.g. see Figure 5 in Hohman 2002<sup>3,5</sup>), (2) GPD1p indirectly controls and is controlled by  
112 osmostress-sensitive kinases that respond to upward and downward changes in water balance<sup>14</sup>,

113 and (3) nuclear Hog-1 MAP kinase increases the transcription of phosphatases that restore its  
114 own cytoplasmic localization and basal activity<sup>15-17</sup>. In short negative feedback is present in  
115 essentially all of the varied mechanisms that act, in concert, to increase intracellular glycerol and  
116 restore water balance.

117 Consistent with acting negative regulation, there was a strong and highly significant  
118 correlation between early mortality (0 – 2 hour decreases in viability) and later accumulations of  
119 *GPD1::GFP* (2 – 4 hours; Table 2). We reasoned that cells and strains that adapt quickly  
120 experience lower and less sustained effects of osmotic stress (e.g. water loss) with more rapidly  
121 attenuated HOG pathway activity and lower *GPD1::GFP* accumulation. Conversely, surviving  
122 cells of strains that were slower to adapt and less viable experience higher and more sustained  
123 osmotic stress (and likely other stresses). Prolonged osmotic stress would sustain HOG  
124 signaling and maintain *GPD1* transcription – which is also activated by general stress  
125 responses<sup>18</sup> – further promoting *GPD1::GFP* accumulation (e.g. negative feedback regulation at  
126 the level of general stress responses). Indeed, even as *GPD1::GFP* and viability became  
127 negatively correlated, their *rates of change* remained positively correlated (2 – 4 hours; Table 2)  
128 prompting a parsimonious and more widely accepted interpretation that osmotic stress signaling  
129 promotes adaptation and viability during both the initial and recovery phases of the response  
130 (Figure 1C, insets).

131 After 4 hours in 0.75M KCl all strains had adapted to a new steady state, and their  
132 later viability remained largely unchanged (Figure 1C inset, lower right). Interestingly, the initial  
133 decreases in steady-state viability (0 to 2 hour mortality) were almost perfectly restored by 4  
134 hours (Figure 1D). And by 6 hours, early mortality and recovery were over 98% correlated ( $R^2 =$   
135 0.9852; not shown). The biological robustness of adaptation and recovery of steady state  
136 viability in moderate hyperosmotic stress further supports the idea that negative feedback, acting  
137 through continued activation of stress responses, drives the accumulation of *GPD1* and glycerol  
138 in the surviving cells of less viable strains (and indeed, glycerol accumulation is a plausible  
139 mechanism of integral feedback in the hyperosmotic stress response assuring perfect  
140 adaptation<sup>17,19</sup>; see Figure 1E). However, despite their resilience in moderate osmotic stress, the  
141 strains that were relatively slower to adapt would be ultimately less fit than rapidly adapting  
142 strains due to their higher death rate, slower recovery, and lower steady-state viabilities before  
143 and after hyperosmotic shifts.

144

### 145 **Extreme stress resistance of older cultures**

146 By contrast with exponential cultures, aging yeast cultures survived and adapted to long periods  
147 in unprecedented osmotic conditions (Movies 1 and 2). As aging cultures reach confluence and  
148 deplete the glucose in their media, stress response proteins accumulate and they undergo a  
149 metabolic change called the diauxic shift<sup>20</sup>. During post-diauxic growth cell division slows and  
150 then stops as cells enter quiescence<sup>10</sup>. Post-diauxic cultures survived up to 5 weeks in 3 M KCl  
151 (41/50 strains) but they could not adapt and did not grow ('static viability'). When they were

152 plated on fresh isotonic media some cells in nearly every strain recovered rapidly and grew  
153 (Figure S2). When we tested their limits of adaptation on increasing concentrations of KCl three  
154 strains grew at 2.9 M KCl and all but one strain grew on 2.6 M KCl media (Table 3). We are  
155 unaware of previous studies reporting such extreme osmotic stress survival or adaption limits for  
156 budding yeast of any growth stage or genotype.

157

### 158 **Heterogeneity of older cultures**

159 By contrast with cultures in exponential growth, in post diauxic growth the genetically identical  
160 cells within each strain and culture were surprisingly heterogeneous in size, shape and signaling  
161 behaviors (compare Figures S1 and S3). Neither total *GPD1::GFP* fluorescence nor rates of  
162 change in fluorescence was strongly correlated with viability. After several hours in 2.5 M KCl  
163 *GPD1::GFP* increased sharply in one group of cells as they began to divide. More surprising,  
164 other cells also induced *GPD1::GFP* to high levels, started to divide and then popped, killing both  
165 the mother and daughter (Movie 3). Another group of cells had slower signaling and cell division  
166 while the most ‘cautious’ cells failed to signal or divide but remained in a cellular state of static  
167 viability without dividing.

168 We used a Gaussian mixture model to assign the cells in each sample to four  
169 Gaussian distributions described by eight parameters – means and covariances – numbered  
170 according to increasing levels of fluorescence ( $G_0$ - $G_3$  distributions; Figure S3). Only  $G_{3_0}$ , that is  
171 *GPD1::GFP* pre-accumulated into cells of the  $G_3$  distribution during post-diauxic growth *prior* to  
172 the osmotic challenge and therefore unrelated to osmotic stress signaling, predicted survival at  
173 any time.  $G_{3_0}$  predicted early but not later viability, and this relationship was better fit by 2<sup>nd</sup>  
174 order quadratic rather than linear functions of *GPD1::GFP*, suggesting early survival was higher  
175 in strains with intermediate  $G_3$  level signaling (more variation explained and lower mean square  
176 errors; Table S3). Despite the fine-scaled characterization of osmotic stress signaling  
177 behaviors of different groups of cells in each strain, none of the distributions learned by the  
178 Gaussian mixture model – neither pre-accumulated  $G_{3_0}$ , total *GPD1::GFP* fluorescence, nor  
179 stress-induced *GPD1::GFP* in any distribution – embodied features of the osmotic stress  
180 signaling that were important for later survival.

181

### 182 **Continuous variation in signaling behavior**

183 In order to map osmotic stress-responsive signaling onto survival more directly we next  
184 quantified the osmotic stress signaling behaviors of the cells in each strain as they unfolded over  
185 time unbiased by Gaussian assumptions or approximations. First, normalized levels of induced  
186 *GPD1::GFP* were binned as in a histogram, creating a ‘sample vector’ of cell numbers in each of  
187 100 successive intervals of fluorescence intensity. Next, sample vectors for increasing time  
188 points in each strain were linked to create time line vectors (700-mers). For comparison of  
189 averaged strain behaviors the time line vectors were clustered using a mean distance matrix,  
190 constructed from 17,000 randomly chosen permutations of the data over replicate samples and

191 times (mean clusters; see methods). Finally, the fraction of permutations in which each strain  
192 grouped with more than half of the other strains in its mean cluster was used to rank that strain's  
193 behavior relative to the other strains in its group (clustering statistics; Table 4).

194 The unique signaling trajectories of most strains were highly reproducible,  
195 demonstrating the genetic basis of strain-specific proportions of cells with divergent behaviors  
196 (Figure S3). Based on their shared and strain-specific signaling behaviors, the 50 strains in our  
197 population rapidly converged onto two large groups made up of six mean clusters (Figure 2).  
198 Each strain was further ordered within and between mean clusters and clades based on their  
199 clustering statistics, with their rank order describing increasingly rapid accumulations of  
200 *GPD1::GFP* and 'reckless' signaling (Figure S4). Both mean cluster and rank predicted viability  
201 over time (Figure S5 and Table 4; respectively) thereby supporting the role of natural osmotic  
202 stress signaling differences between strains in shaping variation in fitness during osmotic stress,  
203 validating our method of clustering, and confirming the biological relevance of 'cautious' versus  
204 'reckless' osmotic stress signaling.

205

### 206 **Evidence for bet hedging**

207 Bet hedging is defined as the expression of alternate, conditionally-adaptive phenotypes within a  
208 clone of genetically identical organisms<sup>9,21-24</sup>. As cautious and reckless behaviors were found  
209 both within and between strains, we wondered whether bet hedging could explain the observed  
210 variation in signaling and survival. Indeed, different ranked signaling behaviors were also  
211 adapted to different osmotic environments. Higher-ranked strains with more aggressive osmotic  
212 stress signaling strategies were favored in milder conditions, but with increasing time in extreme  
213 osmotic stress more cautious strains and behaviors became more fit (Table 4). For example,  
214 W178 at rank 50 was most viable in moderate 0.75 M KCl, but in 2.5 M KCl the optimum rank  
215 was 25 after 20 hours, 20 after 72 hours, and 9.6 after 168 hours (1 week). Viability decreased  
216 most markedly among the most reckless strains (Figure S5). The changing relative fitness of  
217 cautious versus reckless behavior in different environments provides strong empirical evidence  
218 for bet hedging.<sup>22</sup>

219 To further link different bet hedging strategies with the degree and duration of osmotic  
220 stress, we tested the idea that yeast experienced increasing stress over time in severe (2.5 M  
221 KCl) osmotic conditions. We again incubated cultures for 168 hours in 2.5 M KCl, but they were  
222 first exposed to a mild pre-stress (2 hours in 0.5 M KCl) to pre-induce osmotic stress proteins  
223 and make them more resistant to subsequent stress. If optimum rank depended solely on time  
224 independent of the degree of stress experienced by the different strains, then the optimum rank  
225 should not change. However after the pre-stress viability increased by ~10% and optimum rank  
226 shifted back toward more reckless behaviors (rank 9.6 to rank 18;  $P < 0.0001$ ), as expected if the  
227 optimum rank was sensitive to the degree of stress experienced by the cells. After 168 hours in  
228 2.5 M KCl, the most reckless cells began to selectively disappear from the highest-ranking  
229 strains. Replicates with lower viability had fewer cells with high accumulations of *GPD1::GFP*,



230 smaller G3 distributions, and correspondingly larger distributions with lower mean *GPD1::GFP*  
231 (Figure 3A). The loss of cells with the highest accumulations of *GPD1::GFP* could indicate that  
232 *GPD1::GFP* levels decrease as cells begin to die, before they become permeable to vital dyes.  
233 However, G3 distributions were stable over most time points and in most strains. More likely,  
234 after 168 hours in 2.5 M KCl the most aggressive cells in the highest-ranking strains attempt to  
235 divide prematurely and fail (e.g. Movie 3). Rapid signaling and adaptation, a fitness advantage in  
236 milder conditions, becomes a liability in extremely severe or prolonged osmotic stress. On the  
237 other hand static viability, evidenced in the survival of non-dividing cultures in 3 M KCl (Figure  
238 3B) and directly observed by microscopy (Figure 2B), usually has dramatically reduced  
239 evolutionary fitness, but in severe killing stresses it allows more cautious cells and strains to  
240 survive.

241

### 242 **Evolution of bet hedging**

243 As different cells types within each strain were most viable under different conditions, we next  
244 asked whether a simple, 2-state bet hedging model with heritable control of the relative  
245 proportions of cautious and reckless cell types could account for the observed variation in  
246 osmotic stress signaling and explain the complex relationship between rank and viability. If  
247 reckless signaling and aggressive replication were default, ancestral behaviors, then cautious  
248 signaling and behavior could have arisen as a later adaptation to unpredictable and potentially  
249 lethal osmotic environments. We therefore assumed that the heritable probability of daughters  
250 with cautious signaling and behavior ( $P$ ) is the derived, bet hedging trait and ask whether it could  
251 evolve.

252 We considered three very general osmotic stress environments that discriminated  
253 between cautious and reckless cell types: (E0) a permissive environment in which both cautious  
254 and reckless cells grow equally well, (E1) a restrictive environment approximating moderate  
255 osmotic stress reckless cells divide and cautious cells survive without dividing, and (E2) a killing  
256 osmotic stress where reckless cells die and cautious cells survive without cell division. The  
257 relative fitness (cell numbers) of  $0 \leq P \leq 1$  was calculated after several generations in each of 9  
258 possible shifts between the three environments. Most environmental shifts favored optimum  
259 strategies of either all cautious ( $P = 1$ ) or all reckless cell types ( $P = 0$ ; Figure 3D). Strictly  
260 intermediate strategies ( $0 < P < 1$ ) and bet hedging prevailed only when the osmotic environment  
261 shifted from moderate to more severe, with the optimum  $P$  depending on the number of  
262 generations in the first environment (E1  $\rightarrow$  E2). A worsening osmotic environment was  
263 experienced by cells in our experiments and would be common in nature. Shorter lag periods  
264 and more cell divisions in E1 initially favor lower  $P$  and a higher proportion of reckless cells.  
265 Longer lag periods (e.g. more severe conditions) and fewer cell divisions favor higher  $P$  and a  
266 higher proportion of cautious cells. Our empirical data were consistent with this model –  
267 lower-ranked strains with more cautious signaling behaviors, longer lag periods and fewer  
268 attempted cell divisions became increasingly fit over time in extreme osmotic stress (Table 4).



269           While the simple 2-state model of bet hedging behaviors probably does not reflect the  
270 full complexity of each strain's signaling behavior, it provides a conceptual framework for  
271 understanding the observed variation in osmotic stress signaling strategies and generates  
272 testable hypotheses for further studies. Bet hedging in microorganisms has been thought to  
273 arise almost exclusively through stochastic switching with a low probability of alternate  
274 phenotypes<sup>9,25</sup>. By contrast the variation we observe in osmotic stress signaling and behavior is  
275 heritable, representing one of few examples known in a microorganism of the rapidly diversifying,  
276 within-clutch bet hedging strategy of plants and animals<sup>9,25</sup>. If the heritable probabilities of  
277 cautious cells and behavior we observed were sculpted by selection, milder and/or slowly  
278 worsening osmotic environments would generate more reckless strains (W242, rank 49 isolated  
279 from rotting banana; W282, rank 48 isolated from fermenting fruit) and more severe or rapidly  
280 deteriorating osmotic environments would generate cautious strains and behavior (e.g. W455,  
281 rank 1 from molasses; W217, rank 4 from sugar cane syrup). Indeed the general environments  
282 from which each strains wild or industrial genotype was isolated roughly predicted their  
283 aggressiveness but not their rank (for mean percent of cells above threshold;  $P = 0.030$  by  
284 ANOVA). This bears deeper scrutiny, but suggests that growth on rotting fruit or in wine favored  
285 more aggressive osmotic stress signaling strategies than growth in more hyperosmotic sugar  
286 cane syrups, molasses or olive wastes.

287           In conclusion, we applied a standard laboratory assay of a well-characterized osmotic  
288 stress pathway across a population. By viewing strain specific differences in *GPD1::GFP*  
289 accumulation on the backdrop of natural variation in osmotic stress responses and survival we  
290 have been able to identify negative feedback in osmotic stress signaling and robust recovery  
291 during exponential growth. Yeast in nature spend most time in post-diauxic or quiescent  
292 phases<sup>10</sup>. In post diauxic cultures we identified natural variation in cautious to reckless bet  
293 hedging that was heritable and likely balances constraints between osmotic stress survival and  
294 evolutionary fitness. Combining our empirical measurements on each strain with a simple bet  
295 hedging model suggests that control over the probability of cautious signaling and behavior  
296 evolves in response to the frequency, intensity, and duration of episodic environmental stress.

297

298

299

300 **Materials and methods**

301 **Strain acquisition and deposition**

302 Wild and industrial diploid strains of *Saccharomyces cerevisiae* were obtained from the fungal  
303 diversity collection of Centraalbureau voor Schimmelcultures (CBS), an institute of the Royal  
304 Netherlands Academy of Arts and Sciences in Utrecht, Netherlands  
305 (<http://www.cbs.knaw.nl/index.php/collection>). Strains modified for this report are listed in  
306 Tables 1 and S1. They have been deposited to the Yeast Genetic Resources Lab of the  
307 National BioResource Project in Osaka, Japan ([http://yeast.lab.nig.ac.jp/nig/index\\_en.html](http://yeast.lab.nig.ac.jp/nig/index_en.html)).

308

309 **Creation of haploid *MATa* library of wild and industrial genotypes**

310 For unique identification of each strain and prevention of homothalism, the *HO* locus of each wild  
311 or industrial diploid strain was deleted and replaced with the KanMX4 marker gene and unique  
312 barcode sequences<sup>26,27</sup>. The KanMX4 gene was PCR-amplified for transformation of each strain  
313 with primers containing unique sets of barcode sequences<sup>28</sup> (Table S1). Kanamycin-resistant  
314 transformants were sporulated in 1% potassium acetate sporulation medium and *MATa* haploids  
315 were selected by testing for schmoo formation in 96-well plates containing alpha factor. Mating  
316 type was confirmed by test mating with a dominantly marked *MATa* tester strain on replica plates.  
317 The *URA3* gene of the sporulated wild haploids (*MATa*) was deleted using standard gene  
318 deletion method. In brief, pJL164 plasmid DNA was transformed and cells were plated onto  
319 YPD plate grown for overnight at 30°C. Cells were replica plated on 5-FOA and grown for 2  
320 days at 30°C. The *ho* and *ura3* deletions and barcode sequences were verified by PCR and  
321 resulting wild haploids were in many cases validated by their colony morphologies. Forty-nine  
322 wild strains and a laboratory strain met these criteria (see Tables 1 and S1 for strain details).

323

324 **Construction of synthetic population of *GPD1::GFP* wild/lab diploids**

325 The common laboratory strain BY stably integrated *GFP* reporter strain was created by replacing  
326 the *GPD1* gene with *GFP* gene using a deletion cassette containing a *URA3* marker for selection  
327 of transformants on SC-URA plates<sup>28,29</sup>. Wild *MATa* haploids were mated with *MATalpha* GFP  
328 reporter strains. Briefly, *MATa* and *MATalpha* cells were mixed on SC-URA plates for 2 hours  
329 and streaked onto selective SC-URA+G418 plates. To test the BY4742 background for low  
330 function alleles that could critically compromise osmotic stress function, a homozygous  
331 laboratory strain was made by crossing BY4742a to cells of the opposite mating type to create a  
332 50<sup>th</sup> strain in our population (BY4741alpha; Table 2).

333

334 **Ploidy analysis**

335 Polyploids had higher GFP and tolerance to osmotic stress. To screen for triploids or  
336 tetraploids obtained after mating, wild/lab yeast were inoculated into 2 ml YPD with appropriate  
337 antibiotics and cultured for 24 h at 21°C on rotator after which 40 ul of the cultured cells were  
338 then added to fresh 2 ml YPD and cultured for 4 h at 21°C on rotator. 800 ul of cells were fixed

339 with 1.7 ml cold ethanol and stored at -20°C at least 20 minutes, centrifuged at 2300 rpm for 5  
340 min, washed with 100 mM Tris-HCl (pH 7.8) twice, and suspended in 500 ul of 100 mM Tris-HCl  
341 (pH 7.8). To digest ribonucleic acids 10 ul of 10 mg/ml RNase A was added to cell suspension  
342 and they were incubated for at least 60 min at 37°C. Digested cells were then centrifuged at  
343 2300 rpm for 5 min and suspended in 500 ul of FACS buffer (0.5 M Tris-HCl, pH 7.5, MgCl,  
344 NaCl). To dissociate cell clumps cells, they were sonicated for 10 sec at setting 3 (Sonifier Cell  
345 Disrupter, Model W185). Cells were stained with 30 ug/ml Propidium Iodide (PI). After leaving  
346 them for 20 min in the dark, cells were examined for their ploidy with FACS Calibur (Becton  
347 Dickinson).

348

### 349 **Plating assays**

350 Cells cultured in YPD with G418 for 4 d at 21 °C on rotator were diluted to OD<sub>600</sub> 0.1 with  
351 exhausted YPD and sonicated for 5 sec at setting 2.5. 5 ul of cells were plated on YPD with or  
352 without KCl and incubated at 21 °C for 2 months. To determine adaptation limits at which strains  
353 could resume growth in concentrations up to 3 M KCl, we inoculated PD cells in a 96-well plate,  
354 agar media containing increasing concentrations of KCl ranging from 2 to 3 M. After 2-months  
355 incubation at 21°C, we documented adaptation limit, the highest concentration of KCl in which  
356 colonies could grow.

357

### 358 **Microfluidics**

359 We employed custom made microfluidics devices with two fluid inputs as described previously<sup>12</sup>.  
360 Experiments were run at ambient room temperature. Yeast cells were observed using Nikon  
361 TS100 and recorded using a digital camera (Photometrics CoolSnap HQ2) operated by Metavue  
362 (Molecular Dynamics). Analysis of acquired images was performed using Image J software.

363

### 364 **Flow cytometry**

365 After osmotic stress challenge 4 ml of PBS was added to each tube. Cells were isolated by  
366 centrifugation and resuspended in 1 ml PBS, transferred to FACS tubes, sonicated, and stained  
367 with 3 ug/ml propidium iodide (PI) to monitor viability. After 20 min GFP fluorescence and  
368 viability were quantified in a FACS Calibur flow cytometer (Becton Dickinson). Data were  
369 initially analyzed using magnetic windows in FlowJo software to eliminate cell fragments and  
370 dead (PI-positive) cells.

371

### 372 **Flow cytometry data analysis**

373 Raw cell data were initially processed and trimmed to identify cells and the fraction of viable cells  
374 using magnetic windows in FloJO data analysis software. Cell data for each sample including  
375 forward scatter and GFP fluorescence data were then extracted into an executable SQL  
376 database for analysis of single cell data. We performed multi-normal fits to extract quantitative  
377 values of GPD1::GFP for the different cellular conditions of a strain at a given time point. The

378 exact number of distributions to be fit is a parameter that is not determined by the model and was  
379 determined from the data. We found that fitting both *GPD1::GFP* and forward scatter worked  
380 slightly better than *GPD1::GFP* in fitting the data, and that 4 distributions provided more stable  
381 fits than 3 distributions. < Figure S3- fit distributions G0-G4). Multi-normal fits were performed with  
382 the `sklearn.mixture.GMM` Gaussian Mixture Model algorithm of Python scikit package  
383 (<http://scikit-learn.org/stable/index.html>). The exact number of distributions to be fit is a  
384 parameter that is not determined by the model, not determined from the data. We found that  
385 fitting both *GPD1::GFP* and forward scatter worked slightly better than *GPD1::GFP* in fitting the  
386 data, and that 4 distributions was better (smaller ??) than 3 distributions. < Figure S3- fit  
387 distributions G0-G4).

388

### 389 **Clustering**

390 We used a clustering algorithm of *GPD1::GFP* accumulations to characterize the signaling  
391 behaviors of the strains over time. In brief, the *GPD1::GFP* distribution of each strain at every  
392 time point was converted into a vector of cell density (numbers of cells) in a small section (100  
393 sections) of a normalized density plot of cells at each time point. Two-dimensional clustering on  
394 the Kullback-Leibler distance function was used to follow the behavior of each strain over time.  
395 Strains and timepoints were replicated between 4 and 15 times. To control for variation in  
396 sampling and clustering outcomes samples were randomly drawn for each strain and time point  
397 with equal probability for 17000 permutations.

398 Strains were ranked from most static signaling to most aggressive, providing a  
399 continuous relationship between signaling, survival and adaptation with the number of  
400 permutations in which strains clustered with a majority of other strains in their clade was used to  
401 rank strains from the most static to the most aggressive. Computational sorting of time-series  
402 distributions resolved 6 clades differentiated for rates of GFP accumulation, adaptation and  
403 survival. We used a clustering algorithm of *GPD1::GFP* and forward scatter accumulations to  
404 characterize the signaling behaviors of the strains over time. We found that clustering based on  
405 both the combined *GPD1::GFP* and forward scatter data worked slightly better than only  
406 *GPD1::GFP*. In brief, for an experiment we consider for each cell the *GPD1::GFP* and forward  
407 scatter data. This 2D distribution of each strain at every time point was converted first into a 2D  
408 100x100 grid with binned values, then into a normalized linear 1000 elements state vector  
409 characteristic for the *GPD1::GFP* and forward scatter data of cells at each time point. The  
410 vectors for all the  $n$  time points were then successively appended to form a  $n \times 1000$  time line  
411 vector representing the time course of the combined *GPD1::GFP* and forward scatter data. The  
412 vectors were then used to compute a distance matrix between strains at each time point using a  
413 Kullback-Leibler divergence based distance function. We used hierarchical clustering with  
414 Ward's method using the `fastcluster` implementation in Python<sup>30</sup> (<http://www.jstatsoft.org/v53/i09/>).  
415 We found stronger cluster when performing the same analysis using the combined *GPD1::GFP*  
416 and forward scattering for each cell in the flow cytometry, and unless stated otherwise the

417 reported results are in this case. Data from experimental replicates were representatively  
418 sampled for each time point to generate a random average sampling of time line vectors for each  
419 strain.

420

#### 421 **Bet hedging model**

422 The bet hedging 'strategy'  $P$  was defined as the heritable probability of cautious cells for  $0 \leq P \leq$   
423 1. Relative fitness was measured for representative strategies (0, 0.1, 0.2, ... 1.0) after 10  
424 generations in each environment. Nine possible 2-state environmental shifts between three  
425 general osmotic stress environments were considered: permissive (E0; all cells grow equally  
426 well), restrictive (E1; reckless cells divide, cautious cells survive without dividing), and killing (E2;  
427 reckless cells die, cautious cells survive without cell division). For simplicity, the natural attrition  
428 of older cells and rates of cell division were assumed to be equal for all cell types.

429 Results were independent of the number of generations in the first environment except as shown  
430 when E1 was the first environment.

431

432 **References**

433

- 434 1. Kirschner, M. & Gerhart, J. Evolvability. *Proc. Natl. Acad. Sci. U. S. A.* **95**, 8420–8427  
435 (1998).
- 436 2. West-Eberhard, M. J. *Developmental plasticity and evolution.* *Nature* **424**, (2003).
- 437 3. Hohmann, S. Osmotic Stress Signaling and Osmoadaptation in Yeasts. *Microbiol. Mol.*  
438 *Biol. Rev.* **66**, 300–372 (2002).
- 439 4. Hohmann, S., Krantz, M. & Nordlander, B. *Yeast Osmoregulation.* *Methods Enzymol.* **428**,  
440 (Elsevier Masson SAS, 2007).
- 441 5. Saito, H. & Posas, F. Response to hyperosmotic stress. *Genetics* **192**, 289–318 (2012).
- 442 6. Clotet, J. & Posas, F. *Control of Cell Cycle in Response to Osmostress: Lessons from*  
443 *Yeast.* *Methods Enzymol.* **428**, (Elsevier Masson SAS, 2007).
- 444 7. Nadal, E. de, Alepuz, P. & Posas, F. Dealing with osmostress through MAP kinase  
445 activation. *EMBO Rep.* **3**, 735–40 (2002).
- 446 8. Babazadeh, R., Furukawa, T., Hohmann, S. & Furukawa, K. Rewiring yeast osmostress  
447 signalling through the MAPK network reveals essential and non-essential roles of Hog1 in  
448 osmoadaptation. *Sci. Rep.* **4**, 4697 (2014).
- 449 9. Ratcliff, W. C., Hawthorne, P. & Libby, E. Courting disaster: How diversification rate  
450 affects fitness under risk. *Evolution* 1–10 (2014). doi:10.1111/evo.12568
- 451 10. Gray, J. V *et al.* ‘Sleeping beauty’: quiescence in *Saccharomyces cerevisiae*. *Microbiol.*  
452 *Mol. Biol. Rev.* **68**, 187–206 (2004).
- 453 11. Remize, F., Barnavon, L. & Dequin, S. Glycerol export and glycerol-3-phosphate  
454 dehydrogenase, but not glycerol phosphatase, are rate limiting for glycerol production in  
455 *Saccharomyces cerevisiae*. *Metab. Eng.* **3**, 301–312 (2001).
- 456 12. Cookson, S., Ostroff, N., Pang, W. L., Volfson, D. & Hasty, J. Monitoring dynamics of  
457 single-cell gene expression over multiple cell cycles. *Mol. Syst. Biol.* **1**, 2005.0024 (2005).
- 458 13. Miermont, A. *et al.* Severe osmotic compression triggers a slowdown of intracellular  
459 signaling, which can be explained by molecular crowding. *Proc. Natl. Acad. Sci. U. S. A.*  
460 **110**, 5725–30 (2013).
- 461 14. Lee, Y. J., Jeschke, G. R., Roelants, F. M., Thorner, J. & Turk, B. E. Reciprocal  
462 Phosphorylation of Yeast Glycerol-3-Phosphate Dehydrogenases in Adaptation to Distinct  
463 Types of Stress. *Mol. Cell. Biol.* **32**, 4705–4717 (2012).
- 464 15. Jacoby, T. *et al.* Two Protein-tyrosine Phosphatases Inactivate the Osmotic Stress  
465 Response Pathway in Yeast by Targeting the Mitogen-activated Protein Kinase, Hog1. *J.*  
466 *Biol. Chem.* **272**, 17749–17755 (1997).
- 467 16. Wurgler-Murphy, S. M., Maeda, T., Witten, E. a & Saito, H. Regulation of the  
468 *Saccharomyces cerevisiae* HOG1 mitogen-activated protein kinase by the PTP2 and  
469 PTP3 protein tyrosine phosphatases. *Mol. Cell. Biol.* **17**, 1289–1297 (1997).
- 470 17. Muzzey, D., Gómez-Urbe, C. a., Mettetal, J. T. & van Oudenaarden, A. A Systems-Level



- 471 Analysis of Perfect Adaptation in Yeast Osmoregulation. *Cell* **138**, 160–171 (2009).
- 472 18. Boy-Marcotte, E., Perrot, M., Bussereau, F., Boucherie, H. & Jacquet, M. Msn2p and  
473 Msn4p control a large number of genes induced at the diauxic transition which are  
474 repressed by cyclic AMP in *Saccharomyces cerevisiae*. *J. Bacteriol.* **180**, 1044–52 (1998).
- 475 19. Yi, T. M., Huang, Y., Simon, M. I. & Doyle, J. Robust perfect adaptation in bacterial  
476 chemotaxis through integral feedback control. *Proc. Natl. Acad. Sci. U. S. A.* **97**, 4649–  
477 4653 (2000).
- 478 20. Galdieri, L., Mehrotra, S., Yu, S. & Vancura, A. Transcriptional Regulation in Yeast during  
479 Diauxic Shift and Stationary Phase. *Omi. A J. Integr. Biol.* **14**, 629–638 (2010).
- 480 21. Philippi, T. & Seger, J. Hedging one's evolutionary bets, revisited. *Trends Ecol. Evol.*  
481 *(Personal Ed.* **4**, 41–44 (1989).
- 482 22. Simons, A. M. Modes of response to environmental change and the elusive empirical  
483 evidence for bet hedging. *Proc. Biol. Sci.* **278**, 1601–1609 (2011).
- 484 23. King, O. D. & Masel, J. The evolution of bet-hedging adaptations to rare scenarios. *Theor.*  
485 *Popul. Biol.* **72**, 560–575 (2007).
- 486 24. Meyers, L. A. & Bull, J. J. Fighting change with change: Adaptive variation in an uncertain  
487 world. *Trends Ecol. Evol.* **17**, 551–557 (2002).
- 488 25. Ratcliff, W. C. & Denison, R. F. Individual-Level Bet Hedging in the Bacterium  
489 *Sinorhizobium meliloti*. *Curr. Biol.* **20**, 1740–1744 (2010).
- 490 26. Giaever, G. *et al.* Functional profiling of the *Saccharomyces cerevisiae* genome. *Nature*  
491 **418**, 387–391 (2002).
- 492 27. Shoemaker, D. D., Lashkari, D. a, Morris, D., Mittmann, M. & Davis, R. W. Quantitative  
493 phenotypic analysis of yeast deletion mutants using a highly parallel molecular bar-coding  
494 strategy. *Nat. Genet.* **14**, 450–456 (1996).
- 495 28. Wach, A., Brachat, A., Pöhlmann, R. & Philippsen, P. New heterologous modules for  
496 classical or PCR-based gene disruptions in *Saccharomyces cerevisiae*. *Yeast* **10**, 1793–  
497 1808 (1994).
- 498 29. Gietz, R. D. & Woods, R. a. Transformation of yeast by lithium acetate/single-stranded  
499 carrier DNA/polyethylene glycol method. *Methods Enzymol.* **350**, 87–96 (2002).
- 500 30. Müllner, D. fastcluster : Fast Hierarchical , Agglomerative Clustering Routines for R and  
501 Python. *J. Stat. Softw.* **53**, 1–18 (2013).
- 502 31. Mortimer, R. K. & Johnston, J. R. Genealogy of principal strains of the yeast genetic stock  
503 center. *Genetics* **113**, 35–43 (1986).
- 504 32. Brachmann, C. B. *et al.* Designer deletion strains derived from *Saccharomyces cerevisiae*  
505 S288C: A useful set of strains and plasmids for PCR-mediated gene disruption and other  
506 applications. *Yeast* **14**, 115–132 (1998).
- 507
- 508



509 **Supplementary information**

510 Python script for bet hedging model

511 Flow cytometry database

512 3 movies

513

514 **Acknowledgements**

515 The wild strain collection was made in the Rutherford lab thanks to the help of numerous teams  
516 of summer undergraduates. We thank Wyming Lee Pang and Jeff Hasty for help with  
517 microfluidics and Stéphane Douady for advice on scaling single cell data. This research was  
518 supported by a Scholar Award from the Damon Runyon Cancer Research Foundation (SR), NIH  
519 R01 GM068873 (SR) and the Lady Tata Foundation (YH).

520

521 **Author information**

522 The current address for YH is Center for Experimental Animals, Tokyo Medical and Dental  
523 University, 1-5-45 Yushima, Bunkyo-ku, Tokyo 113-8510, Japan. None of the authors have  
524 competing interests.

525

526

527 **Tables**

528 **Table 1. Strains and aliases used in this study.** See Table S1 for details about each of the 49  
 529 wild haploid strain derivatives (WHXXX). For brevity, figures are labeled with the wild parent  
 530 strain number (WXXX; see Table S1 for details).

531

| Strain    | Genotype                                                                                                                         | Source                                                                                                                                                                                                                                                           |
|-----------|----------------------------------------------------------------------------------------------------------------------------------|------------------------------------------------------------------------------------------------------------------------------------------------------------------------------------------------------------------------------------------------------------------|
| WHXXX     | <i>MATa ura3D0 hoD::barcode::KanMX4</i>                                                                                          | This study; haploid Mata isolates of wild strains. See Table S1 for details.                                                                                                                                                                                     |
| BY41      | <i>MATa his3D1 leu2D0 met15D0 ura3D0 flo8-1 hoD::barcode::KanMX4</i>                                                             | Mata derivative of BY4742.                                                                                                                                                                                                                                       |
| BY4742    | <i>MATalpha his3D1 leu2D0 lys2D0 ura3D0 flo8-1</i>                                                                               | This study; BY4741 and BY4742 backgrounds derive from a wild diploid isolated in Nered, California in 1938 on figs (EM93 <sup>31</sup> ; S228C <sup>32</sup> ). They are distinguished primarily by the many generations it has been under laboratory selection. |
| G01       | <i>MATalpha his3D1 leu2D0 lys2D0 ura3D0 flo8-1 gpd1D::GFP::URA3</i>                                                              | This study; BY4742 background. For monitoring GPD1.                                                                                                                                                                                                              |
| WXXX.BY16 | <i>MATa/MATalpha LYS2/lys2D0 ura3D0/URA3 FLO8/flo8-1 hoD::barcode::KanMX4/ho</i>                                                 | This study; 49 wild/lab plus 1 BY41 control. See Table S1 for details.                                                                                                                                                                                           |
| WXXX.G01  | <i>MATa/MATalpha HIS3/his3D1 LEU2/leu2D0 LYS2/lys2D0 ura3D0/ura3D0 FLO8/flo8-1 hoD::barcode::KanMX4/ho GPD1/gpd1D::GFP::URA3</i> | This study. 49 wild/lab plus 1 lab/lab diploids for GPD1 quantification. See Table S1 for details.                                                                                                                                                               |

532

533 **Table 2. Negative feedback between rates of change in *GPD1::GFP* accumulation and**  
 534 **viability.** To control for potential deviations from normality, non-parametric pairwise  
 535 correlations between rates of change in *GPD1::GFP* accumulation and viability within (upper 3  
 536 rows) and between 2 hours time intervals (below). Changes occurring in earlier intervals, which  
 537 were potentially causal for later changes, are listed first. Results were qualitatively similar for  
 538 Pearson's correlations with all significant P-values remaining <0.0001. Significant comparisons  
 539 are indicated in bold.

540

| Interval           | Variable                             | Interval           | Variable                             | Spearman's r   | Prob> r          |
|--------------------|--------------------------------------|--------------------|--------------------------------------|----------------|------------------|
| <b>0 - 2 hours</b> | <b><math>\Delta GPD1::GFP</math></b> | <b>0 - 2 hours</b> | <b><math>\Delta viability</math></b> | <b>0.7725</b>  | <b>&lt;.0001</b> |
| <b>2 - 4 hours</b> | <b><math>\Delta GPD1::GFP</math></b> | <b>2 - 4 hours</b> | <b><math>\Delta viability</math></b> | <b>0.7217</b>  | <b>&lt;.0001</b> |
| 4 - 6 hours        | $\Delta GPD1::GFP$                   | 4 - 6 hours        | $\Delta viability$                   | -0.1992        | 0.4282           |
| <b>0 - 2 hours</b> | <b><math>\Delta viability</math></b> | <b>2 - 4 hours</b> | <b><math>\Delta GPD1::GFP</math></b> | <b>-0.7411</b> | <b>&lt;.0001</b> |
| <b>0 - 2 hours</b> | <b><math>\Delta viability</math></b> | <b>2 - 4 hours</b> | <b><math>\Delta viability</math></b> | <b>-0.9503</b> | <b>&lt;.0001</b> |
| <b>0 - 2 hours</b> | <b><math>\Delta GPD1::GFP</math></b> | <b>2 - 4 hours</b> | <b><math>\Delta GPD1::GFP</math></b> | <b>-0.7697</b> | <b>&lt;.0001</b> |
| <b>0 - 2 hours</b> | <b><math>\Delta GPD1::GFP</math></b> | <b>2 - 4 hours</b> | <b><math>\Delta viability</math></b> | <b>-0.7696</b> | <b>&lt;.0001</b> |
| 1 - 2 hours        | $\Delta viability$                   | 4 - 6 hours        | $\Delta viability$                   | -0.2178        | 0.3854           |
| 1 - 2 hours        | $\Delta viability$                   | 4 - 6 hours        | $\Delta GPD1::GFP$                   | -0.2549        | 0.3073           |
| 1 - 2 hours        | $\Delta GPD1::GFP$                   | 4 - 6 hours        | $\Delta viability$                   | -0.0464        | 0.8548           |
| 1 - 2 hours        | $\Delta GPD1::GFP$                   | 4 - 6 hours        | $\Delta GPD1::GFP$                   | -0.4572        | 0.0565           |
| 2 - 4 hours        | $\Delta viability$                   | 4 - 6 hours        | $\Delta viability$                   | 0.0733         | 0.7726           |
| 2 - 4 hours        | $\Delta viability$                   | 4 - 6 hours        | $\Delta GPD1::GFP$                   | 0.3333         | 0.1765           |
| 2 - 4 hours        | $\Delta GPD1::GFP$                   | 4 - 6 hours        | $\Delta viability$                   | 0.1207         | 0.6332           |
| 2 - 4 hours        | $\Delta GPD1::GFP$                   | 4 - 6 hours        | $\Delta GPD1::GFP$                   | 0.3602         | 0.1421           |

541

542

543 **Table 3. Growth of post diauxic cells at unprecedented limits of adaptation.** Shown are  
544 concentrations of agar media on which post diauxic strains could grow and form colonies.

545

| <b>[KCl] M</b> | <b>Wild/lab (<i>GPD1</i>) diploids*</b>                                                                          |
|----------------|------------------------------------------------------------------------------------------------------------------|
| 2.0            | W455                                                                                                             |
| 2.6            | W027, W035, W167, W202, W203, W242, W285, W454                                                                   |
| 2.7            | W033, W041, W042, W134, W136, W150, W166, W178, W195, W215, W217, W219, W235, W248, W282, W291, W292, W294, BC41 |
| 2.8            | W037, W044, W050, W153, W157, W163, W164, W179, W189, W206, W238, W244, W245, W249, W255, W276, W301, W340       |
| 2.9            | W173, W211, W343                                                                                                 |

546

547

548 **Table 4. Osmotic stress signaling behavior (rank) predicted early and late viability of**  
 549 **post diauxic cultures in osmotic stress.** Least squares predictions of early and late viability by  
 550 linear and 2<sup>nd</sup> order quadratic fits of fluorescence pre-accumulated into the G3 Gaussian at time  
 551 0 (G3\_0) and ranked signaling behavior. The Bonferroni cutoff at the 0.05 level, based on 4  
 552 tests per data set, was 0.0125. Significant fits with lowest root mean squared errors and  
 553 highest fraction of variation explained ( $R^2$ ) shown in bold, predicted values for optimum (x) and  
 554 value at optimum (y) for non-significant fits are marked NS.  
 555

|                              | G3_0 fluorescence (AU) |          | Signaling (rank) |         |
|------------------------------|------------------------|----------|------------------|---------|
|                              | quadratic              | linear   | quadratic        | linear  |
| <b>0 hours, 0M KCl</b>       |                        |          |                  |         |
| probability > F              | <b>0.0006</b>          | 0.0016   | 0.9629           | 0.8454  |
| R_square                     | <b>0.2715</b>          | 0.1891   | 0.0016           | 0.0008  |
| root_mean_square_error       | <b>1.3935</b>          | 1.4548   | 1.6313           | 1.6149  |
| max_viability at optimum (%) | <b>98.8</b>            |          | NS 98.2          |         |
| optimum                      | <b>2626.6</b>          |          | NS 31.9          |         |
| <b>20 hours, 2.5M KCl</b>    |                        |          |                  |         |
| probability > F              | <b>&lt; 0.0001</b>     | < 0.0001 | <b>0.0055</b>    | 0.6023  |
| R_square                     | <b>0.4286</b>          | 0.3138   | <b>0.1987</b>    | 0.0057  |
| root_mean_square_error       | <b>7.0949</b>          | 7.6940   | <b>8.4022</b>    | 9.2615  |
| max_viability at optimum (%) | <b>86.7</b>            |          | <b>86.3</b>      |         |
| optimum                      | <b>2662.5</b>          |          | <b>24.4</b>      |         |
| <b>48 hours, 2.5M KCl</b>    |                        |          |                  |         |
| probability > F              | <b>&lt; 0.0001</b>     | 0.0003   | <b>0.0013</b>    | 0.9159  |
| R_square                     | <b>0.3148</b>          | 0.2371   | <b>0.2464</b>    | 0.0002  |
| root_mean_square_error       | <b>7.6281</b>          | 8.1323   | <b>8.1679</b>    | 9.3096  |
| max_viability at optimum (%) | <b>82.2</b>            |          | <b>82.9</b>      |         |
| optimum                      | <b>2622.3</b>          |          | <b>25.7</b>      |         |
| <b>72 hours, 2.5M KCl</b>    |                        |          |                  |         |
| probability > F              | <b>0.0010</b>          | 0.0033   | <b>0.0062</b>    | 0.8464  |
| R_square                     | <b>0.2556</b>          | 0.1660   | <b>0.1943</b>    | 0.0008  |
| root_mean_square_error       | <b>9.9877</b>          | 10.4608  | <b>10.3903</b>   | 11.4501 |
| max_viability at optimum (%) | <b>73.5</b>            |          | <b>74.3</b>      |         |
| optimum                      | <b>2586.8</b>          |          | <b>25.1</b>      |         |
| <b>96 hours, 2.5M KCl</b>    |                        |          |                  |         |
| probability > F              | <b>0.0060</b>          | 0.0018   | <b>0.0065</b>    | 0.0954  |
| R_square                     | <b>0.1956</b>          | 0.1862   | <b>0.1927</b>    | 0.0569  |
| root_mean_square_error       | <b>8.4186</b>          | 8.3789   | <b>8.4338</b>    | 9.0201  |
| max_viability at optimum (%) | <b>71.7</b>            |          | <b>71.0</b>      |         |
| optimum                      | <b>3389.8</b>          |          | <b>21.3</b>      |         |
| <b>120 hours, 2.5M KCl</b>   |                        |          |                  |         |
| probability > F              | 0.0791                 | 0.0413   | <b>0.0004</b>    | 0.0037  |
| R_square                     | 0.1023                 | 0.0839   | <b>0.2859</b>    | 0.1625  |
| root_mean_square_error       | 8.5666                 | 8.5636   | <b>7.6405</b>    | 8.1881  |
| max_viability at optimum (%) | NS 67.7                |          | <b>74.7</b>      |         |
| optimum                      | NS 1679                |          | <b>18.1</b>      |         |

|                               |           |         |                    |          |
|-------------------------------|-----------|---------|--------------------|----------|
| <b>144 hours, 2.5M KCI</b>    |           |         |                    |          |
| probability > F               | 0.3473    | 0.1675  | <b>0.0047</b>      | 0.0501   |
| R_square                      | 0.0440    | 0.0393  | <b>0.2038</b>      | 0.0776   |
| root_mean_square_error        | 9.6837    | 9.6059  | <b>8.8377</b>      | 9.4123   |
| max_viability at optimum (%)  | NS 61.9   |         | <b>68.3</b>        |          |
| optimum                       | NS 1481.3 |         | <b>20.4</b>        |          |
| <b>168 hours, 2.5M KCI</b>    |           |         |                    |          |
| probability > F               | 0.1785    | 0.3433  | <b>&lt;0.0001</b>  | < 0.0001 |
| R_square                      | 0.0707    | 0.0187  | <b>0.5733</b>      | 0.4911   |
| root_mean_square_error        | 12.3795   | 12.5879 | <b>8.3885</b>      | 9.0652   |
| max_viability at optimum (%)  | NS 56.2   |         | <b>68.4</b>        |          |
| optimum                       | NS 2077   |         | <b>9.7</b>         |          |
| <b>24 hours, 3M KCI</b>       |           |         |                    |          |
| probability > F               | 0.0107    | 0.0292  | <b>&lt; 0.0001</b> | < 0.0001 |
| R_square                      | 0.1757    | 0.0952  | <b>0.5254</b>      | 0.2980   |
| root_mean_square_error        | 11.8963   | 12.3332 | <b>9.0267</b>      | 10.8635  |
| max_viability at optimum (%)  | 71.7      |         | <b>65.0</b>        |          |
| optimum rank                  | 2029.2    |         | <b>18.1</b>        |          |
| <b>48 hours, 3M KCI</b>       |           |         |                    |          |
| probability > F               | 0.0294    | 0.0140  | <b>&lt; 0.0001</b> | 0.0003   |
| R_square                      | 0.1394    | 0.1193  | <b>0.5382</b>      | 0.2402   |
| root_mean_square_error        | 12.8903   | 12.9029 | <b>9.4420</b>      | 11.9849  |
| max_viability at optimum (%)  | NS 57.1   |         | <b>62.3</b>        |          |
| optimum                       | NS 2867.3 |         | <b>19.7</b>        |          |
| <b>72 hours, 3M KCI</b>       |           |         |                    |          |
| probability > F               | 0.0519    | 0.0395  | <b>&lt; 0.0001</b> | 0.0002   |
| R_square                      | 0.1183    | 0.0853  | <b>0.5459</b>      | 0.2460   |
| root_mean_square_error        | 12.4241   | 12.5218 | <b>8.9158</b>      | 11.3687  |
| max_viability at optimum (%)  | NS 51.4   |         | <b>56.9</b>        |          |
| optimum                       | NS 2651   |         | <b>19.7</b>        |          |
| <b>Adaptation limit</b>       |           |         |                    |          |
| probability > F               | 0.5435    | 0.2699  | <b>0.0002</b>      | 0.0086   |
| R_square                      | 0.0262    | 0.0258  | <b>0.3099</b>      | 0.1379   |
| root_mean_square_error        | 0.1344    | 0.1330  | <b>0.1132</b>      | 0.1251   |
| max_concentration optimum (M) | NS 2.8    |         | <b>2.8</b>         |          |
| optimum                       | NS -95.6  |         | <b>31.2</b>        |          |

556

557

558 **Table S1. Haploid derivatives of wild strains.** The source for all wild strains in this study  
 559 was the strain collection of the Royal Netherlands Academy of Arts and Sciences over the past  
 560 100 years (Table 1 and Table S1). This resource has been deposited at the Yeast Genetic  
 561 Resources Lab of the National BioResource Project in Osaka, Japan.

562

| Alias | MAT | Genotype                            | Comments                                                                                                                                                                                                                        |
|-------|-----|-------------------------------------|---------------------------------------------------------------------------------------------------------------------------------------------------------------------------------------------------------------------------------|
| WH027 | a   | MATa ura3D0<br>hoD::barcode::KanMX4 | Original CBS #: CBS 459; isolated in 1938 in Castellina, Italy from grape must; barcode #29(Uptag sequence: GGCCCGCACACAATTAGGAA, Downtag sequence: GCGCCGCATTAATAACTAACTA)                                                     |
| WH030 | a   | MATa ura3D0<br>hoD::barcode::KanMX4 | Original CBS #: CBS 1508; isolated in 1927 from starter for sorghum brandy; YH note: mating defective, hard to make wild/lab diploids; barcode #16(Uptag sequence: GTCCGAACATCAACACGTA, Downtag sequence: GCGCAGGAGAAACCTCTTAA) |
| WH033 | a   | MATa ura3D0<br>hoD::barcode::KanMX4 | Original CBS #: CBS 405 ; isolated in 1925 in West Africa from catabo for billi wine, from <i>Osbeckia grandiflora</i> ; barcode #187(Uptag sequence: CCGTGTACTGAATTACGATC, Downtag sequence: CCATCTTTGGTAATGTGAGG)             |
| WH035 | a   | MATa ura3D0<br>hoD::barcode::KanMX4 | Original CBS #: CBS 5822; isolated in 1967 from malt wine; barcode #30(Uptag sequence: GGTCTATGCAAACACCCGAA, Downtag sequence: GCCGTCTTGACAACCTTATA)                                                                            |
| WH037 | a   | MATa ura3D0<br>hoD::barcode::KanMX4 | Original CBS #: CBS 1395; isolated in 1922 from an unknown source ; barcode #235(Uptag sequence: GGCTAAGGGACAACACCTCA, Downtag sequence: GCCCGGCACATAGAAGTAAC)                                                                  |
| WH041 | a   | MATa ura3D0<br>hoD::barcode::KanMX4 | Original CBS #: CBS 5635; isolated in 1958 in South Africa from grape must; barcode #2(Uptag sequence: CCATGATGTAAACGATCCGA, Downtag sequence: TATATGGCAGCAGATCGCCG)                                                            |
| WH042 | a   | MATa ura3D0<br>hoD::barcode::KanMX4 | Original CBS #: CBS 3081; isolated in 1958 in Spain from alpechin; barcode #12(Uptag sequence: GTGCGAACCAACGTACTACA, Downtag sequence: GCAGGAACACCACAGGGTTA)                                                                    |
| WH044 | a   | MATa ura3D0<br>hoD::barcode::KanMX4 | Original CBS #: CBS 422; isolated in 1926 in Odessa, Ukraine from beer; barcode #135(Uptag sequence: CCCGCGATTGTAATGAATAG, Downtag sequence: CATACTACGTGGGACAGTTG)                                                              |
| WH050 | a   | MATa ura3D0<br>hoD::barcode::KanMX4 | Original CBS #: CBS 5112; isolated in 1962 in Spain from grape must; barcode #49(Uptag sequence: CTTACTGATAGCGTAGAGGT, Downtag sequence: GTGGTCTGCAAACCCAACAA)                                                                  |
| WH134 | a   | MATa ura3D0<br>hoD::barcode::KanMX4 | Original CBS #: CBS 2964; isolated in 1947 in Copenhagen, Denmark from distiller's rum yeast; barcode #18(Uptag sequence: GCCCTGATAACAAGGTGTAA, Downtag sequence: GCGCCTATTACACAAACGTA)                                         |



|       |   |                                     |                                                                                                                                                                                           |
|-------|---|-------------------------------------|-------------------------------------------------------------------------------------------------------------------------------------------------------------------------------------------|
| WH136 | a | MATa ura3D0<br>hoD::barcode::KanMX4 | Original CBS #: CBS 2811; isolated in 1957 from wine; wine yeast; barcode #20(Uptag sequence: GTGAGCGAAACACCGCGTAA, Downtag sequence: GGTAATACGCAACTCCTCTA)                               |
| WH150 | a | MATa ura3D0<br>hoD::barcode::KanMX4 | Original CBS #: CBS 2962; isolated in 1947 in Copenhagen, Denmark from ; distiller's rum yeast; barcode #15(Uptag sequence: GCCGTAGCCACAAGAGTTAA, Downtag sequence: GCGGCCACTTACACAAATTA) |
| WH153 | a | MATa ura3D0<br>hoD::barcode::KanMX4 | Original CBS #: CBS 6458; isolated in 1972 location not reported; barcode #37(Uptag sequence: GGGACCGCCAAAGCTATCAA, Downtag sequence: GTGAACAATAACGGCCTTGA)                               |
| WH157 | a | MATa ura3D0<br>hoD::barcode::KanMX4 | Original CBS #: CBS 6506; isolated in 1973 in UK brewery; killer yeast; barcode #53(Uptag sequence: CTGAGCGTAGGATATTCCGT, Downtag sequence: GCCGGTCGCAAACCTCATAAA)                        |
| WH163 | a | MATa ura3D0<br>hoD::barcode::KanMX4 | Original CBS #: CBS 6914; isolated in 1977 in Spain from white wine; barcode #51(Uptag sequence: CTACGTGCGCTCATAGTCGT, Downtag sequence: GCTCTCGGCCAAGGAAACAA)                            |
| WH164 | a | MATa ura3D0<br>hoD::barcode::KanMX4 | Original CBS #: CBS 6978; isolated in 1984 from wine; wine yeast; barcode #59(Uptag sequence: CACTCGGATTCAGTTCTAGT, Downtag sequence: GGCCTTGCCAAACAGTCAAA)                               |
| WH166 | a | MATa ura3D0<br>hoD::barcode::KanMX4 | Original CBS #: CBS 7072; isolated in 1980 from distillate; barcode #62(Uptag sequence: CCTAGTTCGAGATTGCGAGT, Downtag sequence: GTGGTCGCCCAAGCAACAAA)                                     |
| WH167 | a | MATa ura3D0<br>hoD::barcode::KanMX4 | Original CBS #: CBS 7173; isolated in 1985 from catabo for billi wine; wine yeast; barcode #43(Uptag sequence: CAGTATGCTAGATTCCGGGT, Downtag sequence: GTCCTCGCAAGAAAGGCCAA)              |
| WH173 | a | MATa ura3D0<br>hoD::barcode::KanMX4 | Original CBS #: CBS 8615; isolated in 1998 in Italy from grape must; dry yeast for wine making; barcode #61(Uptag sequence: CCTGTAGTACGAGTATGAGT, Downtag sequence: GGTCTGCCAAAGTCACAAA)  |
| WH178 | a | MATa ura3D0<br>hoD::barcode::KanMX4 | Original CBS #: CBS 1192; isolated in 1928 from wine; wine yeast; barcode #155(Uptag sequence: CGCACACGATTAAGGTCCAG, Downtag sequence: CACTGTTGGTAAGGTCTATG)                              |
| WH179 | a | MATa ura3D0<br>hoD::barcode::KanMX4 | Original CBS #: CBS 1193; isolated in 1928 from wine; wine yeast; barcode #70(Uptag sequence: CAATAGGGTGTGACAGTTCT, Downtag sequence: CTACTIONCGCTGAGCTGGTT)                              |
| WH189 | a | MATa ura3D0<br>hoD::barcode::KanMX4 | Original CBS #: CBS 1241; isolated in 1930 from an unknown source ; barcode #212(Uptag sequence: CCACTTAGTTCAATAGGCGC, Downtag sequence: CCGAGTATTACATTCTCACG)                            |

|       |   |                                     |                                                                                                                                                                                                                                                                                                             |
|-------|---|-------------------------------------|-------------------------------------------------------------------------------------------------------------------------------------------------------------------------------------------------------------------------------------------------------------------------------------------------------------|
| WH195 | a | MATa ura3D0<br>hoD::barcode::KanMX4 | Original CBS #: CBS 1256; isolated in 1937 from port wine; barcode #123(Uptag sequence: CGTGGAGCAGTTCGTATAAT, Downtag sequence: CTCGACGCTGGACGTTATGT)                                                                                                                                                       |
| WH202 | a | MATa ura3D0<br>hoD::barcode::KanMX4 | Original CBS #: CBS 7372; isolated in 1988; killer yeast, K2Rd (Young & Yagi), K2R2 (Wickner); barcode #119(Uptag sequence: CAACGTAGAGTGAGGTACAT, Downtag sequence: CACTTAGCTTAGACTCGTGT)                                                                                                                   |
| WH203 | a | MATa ura3D0<br>hoD::barcode::KanMX4 | Original CBS #: CBS 7438; isolated in 1989 from wine; wine yeast; barcode #65(Uptag sequence: CTTTCGGACGTATGTGCAGT, Downtag sequence: CCTTGATGATAGAGGGCTTT)                                                                                                                                                 |
| WH206 | a | MATa ura3D0<br>hoD::barcode::KanMX4 | Original CBS #: CBS 7833; isolated in 1994 in Missouri, USA from lung of a man with immune deficiency syndrome; virulent strain; barcode #82(Uptag sequence: CATACAAAGAGAGGTGCCT, Downtag sequence: CCCTTGCGATTGGTGCAGTT)                                                                                   |
| WH211 | a | MATa ura3D0<br>hoD::barcode::KanMX4 | Original CBS #: CBS 7838; isolated in 1994 in USA from patient; barcode #144(Uptag sequence: CGATACAAGTAAGTTGCGAG, Downtag sequence: CCTCTTACGAGATAGCGGTG)                                                                                                                                                  |
| WH215 | a | MATa ura3D0<br>hoD::barcode::KanMX4 | Original CBS #: CBS 7962; isolated in 1984 in Sao Paulo, Brazil from fermenting concentrated syrup from sugar cane; barcode #94(Uptag sequence: CCCGATTGAGGCATGGTTAT, Downtag sequence: CGCTTCGAGTATGGGATATT)                                                                                               |
| WH217 | a | MATa ura3D0<br>hoD::barcode::KanMX4 | Original CBS #: CBS 7964; isolated in 1995 in Sao Paulo, Brazil from fermenting concentrated syrup from sugar cane; barcode #92(Uptag sequence: CGCGGAGTATAGAGCTTTAT, Downtag sequence: CAATCGCTCGGAGGCGTATT)                                                                                               |
| WH219 | a | MATa ura3D0<br>hoD::barcode::KanMX4 | Original CBS #: CBS 439 ; isolated in 1933 in Lager Schartel, Germany from Silvaner grapes; barcode #93(Uptag sequence: CGACCCTGATGATCCTTTAT, Downtag sequence: CTACGGGCTCGATGCCTATT)                                                                                                                       |
| WH235 | a | MATa ura3D0<br>hoD::barcode::KanMX4 | Original CBS #: CBS 5952; isolated in 1968; barcode #102(Uptag sequence: GGCTACGATACATCTTCATC, Downtag sequence: CATTGTAAACCAGTTCGCTC)                                                                                                                                                                      |
| WH238 | a | MATa ura3D0<br>hoD::barcode::KanMX4 | Original CBS #: CBS 6223; isolated in 1969 in Chile from grape juice; radiation resistant; barcode #104(Uptag sequence: CTATGTGCGGTAAGACGTAT, Downtag sequence: CGGCGTAGATTGTTAGCATT)                                                                                                                       |
| WH242 | a | MATa ura3D0<br>hoD::barcode::KanMX4 | Original CBS #: CBS 6333; isolated in 1942 in Costa Rica from rotting banana; Strain name NRRL Y-1350 (synonymous designation; NRRL YB-210, NRRL-210, NRRL-B210; Mortimer and Johnston (1986), Genetics 113: 35); barcode #56(Uptag sequence: CCTGTAGATTGACGTGTAGT, Downtag sequence: GCCCTCGTGACAAATCGAAA) |

|       |   |                                     |                                                                                                                                                                                                                                                                                                           |
|-------|---|-------------------------------------|-----------------------------------------------------------------------------------------------------------------------------------------------------------------------------------------------------------------------------------------------------------------------------------------------------------|
| WH244 | a | MATa ura3D0<br>hoD::barcode::KanMX4 | Original CBS #: CBS 8266; isolated in 1996 in from rotting fig; Strain name X2180, derived from S288C by self-diploidization (Mortimer and Johnston (1986), Genetics 113: 35). Did not survive freeze-drying.; barcode #122(Uptag sequence: CAGAGGGCACTGTTCTTAAT, Downtag sequence: CCCTGCTGTAGAGGTTATGT) |
| WH245 | a | MATa ura3D0<br>hoD::barcode::KanMX4 | Original CBS #: CBS 3000; isolated in 1956 in Pakistan from palm wine; wine yeast; barcode #138(Uptag sequence: CACATCGTTTAACTGAG, Downtag sequence: CTAGGAGGTTACAGTCATTG)                                                                                                                                |
| WH248 | a | MATa ura3D0<br>hoD::barcode::KanMX4 | Original CBS #: CBS 8049; isolated in 1981 from fish food; feed for fish and crustaceans; barcode #108(Uptag sequence: CGACCCGATGTAGTAGATAT, Downtag sequence: CCGCCGATGTGATATAATT)                                                                                                                       |
| WH249 | a | MATa ura3D0<br>hoD::barcode::KanMX4 | Original CBS #: CBS 6069; isolated in 1981; hybrid strain (Y55-2 x JJ101); barcode #87(Uptag sequence: CACTGTGACCGAGGGATACT, Downtag sequence: CGCGCTATTATACTCGACTT)                                                                                                                                      |
| WH255 | a | MATa ura3D0<br>hoD::barcode::KanMX4 | Original CBS #: CBS 3090; isolated in 1958 from white grape must; barcode #72(Uptag sequence: CACTGTGGACGATACGGTCT, Downtag sequence: CTGTACGTGCGATACTCGTT)                                                                                                                                               |
| WH276 | a | MATa ura3D0<br>hoD::barcode::KanMX4 | Original CBS #: CBS 1394; isolated in 1924 from pressed yeast; distillery yeast; barcode #176(Uptag sequence: CCACCGATGTAATTTGAGTC, Downtag sequence: CACTCTGCGTTAATGTTGGG)                                                                                                                               |
| WH282 | a | MATa ura3D0<br>hoD::barcode::KanMX4 | Original CBS #: CBS 1460; isolated in 1927 in Indonesia from fermenting fruit; barcode #115(Uptag sequence: CATACTTAGGGATCAGGGAT, Downtag sequence: CCTTGTCTGAGAGCCGTTGT)                                                                                                                                 |
| WH285 | a | MATa ura3D0<br>hoD::barcode::KanMX4 | Original CBS #: CBS 1479; isolated in 1928 from wine; wine yeast; barcode #240(Uptag sequence: GCGGCCAATAGTAACTTCA, Downtag sequence: GCCGCCGTGATAAGAAACAC)                                                                                                                                               |
| WH291 | a | MATa ura3D0<br>hoD::barcode::KanMX4 | Original CBS #: CBS 1576; isolated in 1931 in Sulawesi, Indonesia from sap of Arenga palm; barcode #117(Uptag sequence: CCTGAGGACTTATTCACGAT, Downtag sequence: CATTGGATTAGACCGTGTGT)                                                                                                                     |
| WH292 | a | MATa ura3D0<br>hoD::barcode::KanMX4 | Original CBS #: CBS 1582; isolated in 1948 in Portugal from wine; barcode #118(Uptag sequence: CCGATTAGAGGTTGACAGAT, Downtag sequence: CACTGACTTCGAGGTCGTGT)                                                                                                                                              |
| WH294 | a | MATa ura3D0<br>hoD::barcode::KanMX4 | Original CBS #: CBS 1585; isolated in 1934 from sake-moto; sake yeast; barcode #180(Uptag sequence: CATTAAAGGCGCACGTTTATC, Downtag sequence: CTATCCTAGAGATTTGAGGG)                                                                                                                                        |
| WH301 | a | MATa ura3D0<br>hoD::barcode::KanMX4 | Original CBS #: CBS 1594; isolated in 1936 from juice of aren palm; barcode #182(Uptag sequence: CACGTTTGCGAATAGGTATC, Downtag sequence: CAGATACTATTAAGTGCCGG)                                                                                                                                            |

|                  |   |                                                                     |                                                                                                                                                                                                                                                                                                                               |
|------------------|---|---------------------------------------------------------------------|-------------------------------------------------------------------------------------------------------------------------------------------------------------------------------------------------------------------------------------------------------------------------------------------------------------------------------|
| WH340            | a | MATa ura3D0<br>hoD::barcode::KanMX4                                 | Original CBS #: CBS 2805; isolated in 1954 from wine; wine yeast, particularly suitable for fruit wines; barcode #233(Uptag sequence: GCCGGGCTTAAATTGAATCA, Downtag sequence: GCTCCGACTGAAGAACTAAC)                                                                                                                           |
| WH343            | a | MATa ura3D0<br>hoD::barcode::KanMX4                                 | Original CBS #: CBS 2808; isolated in 1954 from grapes (Blauer Portugieser); wine yeast, suitable for fruit wines, yields more than 18% of alcohol; barcode #224(Uptag sequence: CCCGTGAATATAAGTGAAGC, Downtag sequence: CCTGGATTTGAAGCGTATAG)                                                                                |
| WH454            | a | MATa ura3D0<br>hoD::barcode::KanMX4                                 | Original CBS #: CBS 6412; isolated in 1952 from sake; sake yeast; barcode #192(Uptag sequence: CCTTAGGGATAATGAGTTGC, Downtag sequence: CCAGTGTCTAACGTGCAGG)                                                                                                                                                                   |
| WH455            | a | MATa ura3D0<br>hoD::barcode::KanMX4                                 | Original CBS #: CBS 440 ; isolated in 1934 in Taiwan from molasses; barcode #249(Uptag sequence: GCCCAGGCTAAATGTTAAGA, Downtag sequence: GAAGTACGCTCAAGACCGAC)                                                                                                                                                                |
| BC4741<br>(BY41) | a | MATa his3D1 leu2D0<br>met15D0 ura3D0 flo8-1<br>hoD::barcode::KanMX4 | Original CBS #: Lab strain, BY4741; isolated in 1938 in Merced, CA, USA from rotting fig; derived from S288C, of which strain 88% of the gene pool is contributed by strain EM93 (Mortimer and Johnston (1986), Genetics 113: 35). Barcode #266(Uptag sequence: GGCCTAACTCAACAGACGGA, Downtag sequence: GCGCTCGACTAAGAGAAACC) |

563

564

565 **Table S2. Clustering statistics used to rank signaling behavior.** Statistics showing the  
 566 fraction of 17,000 permutations in which strains ranked with 50% of other strains in each mean  
 567 cluster. These data were used to rank total signaling behaviors from most cautious (1) to most  
 568 reckless (50) based on the fraction of time each strain was associated with its mean cluster  
 569 (characteristic of that cluster). See Figure 2.  
 570

| Rank | Cluster | Strain | MC0    | MC1    | MC3    | MC2    | MC5    | MC4    |
|------|---------|--------|--------|--------|--------|--------|--------|--------|
| 1    | MC0     | W455   | 0.8484 | 0.1516 | 0      | 0      | 0      | 0      |
| 2    | MC0     | W167   | 0.8365 | 0.1635 | 0      | 0      | 0      | 0      |
| 3    | MC1     | W219   | 0.6375 | 0.3625 | 0      | 0      | 0      | 0      |
| 4    | MC1     | W217   | 0.5536 | 0.4460 | 0.0004 | 0      | 0      | 0      |
| 5    | MC1     | W027   | 0.5214 | 0.4755 | 0.0028 | 0.0002 | 0      | 0      |
| 6    | MC1     | W042   | 0.4850 | 0.4892 | 0.0191 | 0.0044 | 0.0023 | 0.0001 |
| 7    | MC1     | W235   | 0.1976 | 0.5532 | 0.2266 | 0.0226 | 0      | 0.0002 |
| 8    | MC1     | W340   | 0.1700 | 0.5803 | 0.2354 | 0.0142 | 0      | 0      |
| 9    | MC1     | W454   | 0.3355 | 0.6610 | 0.0034 | 0      | 0      | 0      |
| 10   | MC1     | W134   | 0.1686 | 0.7376 | 0.0821 | 0.0117 | 0      | 0      |
| 11   | MC1     | W276   | 0.1617 | 0.7643 | 0.0658 | 0.0083 | 0      | 0      |
| 12   | MC1     | W294   | 0.1692 | 0.7834 | 0.0440 | 0.0034 | 0      | 0      |
| 13   | MC1     | W157   | 0.1195 | 0.7851 | 0.0866 | 0.0088 | 0      | 0      |
| 14   | MC1     | W202   | 0.1671 | 0.7855 | 0.0446 | 0.0027 | 0      | 0      |
| 15   | MC1     | W238   | 0.1337 | 0.8048 | 0.0580 | 0.0036 | 0      | 0      |
| 16   | MC1     | W035   | 0.1293 | 0.8086 | 0.0572 | 0.0050 | 0      | 0      |
| 17   | MC1     | W248   | 0.1494 | 0.8331 | 0.0172 | 0.0003 | 0      | 0      |
| 18   | MC3     | W130   | 0.0003 | 0.0671 | 0.7020 | 0.2307 | 0      | 0      |
| 19   | MC3     | W136   | 0      | 0.0092 | 0.6572 | 0.3334 | 0.0002 | 0      |
| 20   | MC3     | W203   | 0.0025 | 0.1348 | 0.6410 | 0.2214 | 0.0002 | 0      |
| 21   | MC3     | W285   | 0.0003 | 0.0806 | 0.6245 | 0.2924 | 0.0022 | 0      |
| 22   | MC3     | W163   | 0.0011 | 0.1474 | 0.6228 | 0.2285 | 0.0002 | 0      |
| 23   | MC3     | W206   | 0      | 0.0036 | 0.6203 | 0.3747 | 0.0014 | 0      |
| 24   | MC3     | BY41   | 0      | 0.0123 | 0.6102 | 0.3768 | 0.0008 | 0      |
| 25   | MC3     | W041   | 0.0002 | 0.0233 | 0.5625 | 0.4090 | 0.0050 | 0      |
| 26   | MC3     | W343   | 0.0012 | 0.0432 | 0.5522 | 0.3910 | 0.0123 | 0.0002 |
| 27   | MC3     | W292   | 0.0201 | 0.1962 | 0.4883 | 0.2893 | 0.0062 | 0      |
| 28   | MC3     | W189   | 0.0001 | 0.0205 | 0.4757 | 0.4715 | 0.0319 | 0.0003 |
| 29   | MC3     | W211   | 0      | 0      | 0.3698 | 0.5572 | 0.0696 | 0.0033 |
| 30   | MC2     | W245   | 0      | 0      | 0.2579 | 0.6898 | 0.0523 | 0      |
| 31   | MC2     | W291   | 0      | 0      | 0.2211 | 0.6786 | 0.0994 | 0.0009 |
| 32   | MC2     | W164   | 0      | 0      | 0.1517 | 0.6601 | 0.1852 | 0.0031 |

|    |     |      |        |        |        |        |        |        |
|----|-----|------|--------|--------|--------|--------|--------|--------|
| 33 | MC2 | W249 | 0      | 0      | 0.3349 | 0.6417 | 0.0233 | 0.0001 |
| 34 | MC2 | W166 | 0      | 0      | 0.3372 | 0.6407 | 0.0220 | 0.0001 |
| 35 | MC2 | W179 | 0      | 0.0002 | 0.3569 | 0.6212 | 0.0217 | 0      |
| 36 | MC2 | W244 | 0      | 0      | 0.1478 | 0.6160 | 0.2225 | 0.0137 |
| 37 | MC2 | W173 | 0      | 0.0003 | 0.3801 | 0.6005 | 0.0188 | 0.0002 |
| 38 | MC2 | W215 | 0      | 0.0012 | 0.3162 | 0.6000 | 0.0815 | 0.0011 |
| 39 | MC2 | W037 | 0      | 0      | 0.0714 | 0.5308 | 0.3863 | 0.0115 |
| 40 | MC2 | W255 | 0      | 0.0011 | 0.4771 | 0.5141 | 0.0077 | 0      |
| 41 | MC2 | W050 | 0      | 0      | 0.0567 | 0.4672 | 0.4417 | 0.0343 |
| 42 | MC5 | W044 | 0      | 0      | 0.0021 | 0.0728 | 0.8501 | 0.0750 |
| 43 | MC5 | W195 | 0      | 0      | 0.0019 | 0.0744 | 0.8501 | 0.0736 |
| 44 | MC5 | W301 | 0      | 0      | 0.0029 | 0.0882 | 0.8203 | 0.0887 |
| 45 | MC5 | W150 | 0.0001 | 0.0004 | 0.0006 | 0.0414 | 0.7978 | 0.1598 |
| 46 | MC5 | W033 | 0      | 0      | 0      | 0.0279 | 0.7196 | 0.2525 |
| 47 | MC5 | W153 | 0      | 0      | 0      | 0.0181 | 0.6545 | 0.3274 |
| 48 | MC4 | W282 | 0      | 0      | 0      | 0      | 0.0596 | 0.9404 |
| 49 | MC4 | W242 | 0      | 0      | 0      | 0.0002 | 0.1477 | 0.8521 |
| 50 | MC4 | W178 | 0      | 0      | 0      | 0.0017 | 0.1697 | 0.8286 |

571

572

573 **Table S3**

574 **Plate key**

575 **Left**

|   | 1         | 2         | 3         | 4         | 5         | 6         |
|---|-----------|-----------|-----------|-----------|-----------|-----------|
| A | W027.BY01 | W044.BY01 | W153.BY01 | W173.BY01 | W203.BY01 | W235.BY01 |
| B | W033.BY01 | W050.BY01 | W157.BY01 | W178.BY01 | W206.BY01 | W238.BY01 |
| C | W035.BY01 | W130.BY01 | W163.BY01 | W179.BY01 | W211.BY01 | W242.BY01 |
| D | W037.BY01 | W134.BY01 | W164.BY01 | W189.BY01 | W215.BY01 | W244.BY01 |
| E | W041.BY01 | W136.BY01 | W166.BY01 | W195.BY01 | W217.BY01 | W245.BY01 |
| F | W042.BY01 | W150.BY01 | W167.BY01 | W202.BY01 | W219.BY01 | W248.BY01 |

576

577 **Right**

|   | 1         | 2         | 3         |
|---|-----------|-----------|-----------|
| A | W249.BY01 | W292.BY01 | W455.BY01 |
| B | W255.BY01 | W294.BY01 |           |
| C | W276.BY01 | W301.BY01 |           |
| D | W282.BY01 | W340.BY01 |           |
| E | W285.BY01 | W343.BY01 |           |
| F | W291.BY01 | W454.BY01 |           |

578

579

580 **Figure legends**

581 **Figure 1. Rate of osmotic stress signaling in exponential cultures with negative feedback**  
582 **predicts early survival and robust recovery in moderate osmotic stress.**

- 583 A. Time course of mean accumulated *GPD1::GFP* fluorescence in exponential cultures  
584 exposed to 0.75 and 1.5 M KCl. Each point represents an independent replicate  
585 measurement; curves connect strain means at each time. In the absence of stress, all  
586 strains had high steady-state viability (propidium iodide dye exclusion; range 96.3 –  
587 98.7%; mean 97.6%) and relatively low mean GFP fluorescence indicating low  
588 background activity of HOG pathway signaling through the GPD1 promoter and low  
589 *GPD1::GFP* accumulation (range 12.7 – 34.8 AU; mean 18.8 AU).
- 590 B. Pie charts show relative changes after 2 hours in 0.75M KCl of mean viability (shaded  
591 area), mortality (white area) and *GPD1::GFP* accumulation (percent opacity). Strains  
592 ordered by viability at 2 hours, which was proportional to viability of non-disrupted  
593 controls having two intact copies of the GPD1 gene ( $R^2 = 0.7085$ ;  $P < 0.0001$ ).
- 594 C. Relationship between mean *GPD1::GFP* accumulation and viability in mid-exponential  
595 cultures exposed to 0.75 M KCl for 0, 2, 4, and 6 hours (h). Each data point represents  
596 the average of at least three replicates per strain (~10,000 cells/ sample). The ellipses  
597 indicate correlations between viability and fluorescence at  $\alpha = 0.95$ . The inserts show  
598 relationships between changes in *GPD1::GFP* and viability over each time interval.
- 599 D. Robust recovery of steady-state viability after 4 hours in 0.75 M KCl driven by negative  
600 feedback (see text;  $\text{recovery} = (0.7670) \text{ early mortality} + 3.4936$ ;  $R^2 = 0.9351$ ;  $P <$   
601  $0.0001$ ).
- 602 E. Plausible integrating negative control via multiple feedback mechanisms resulting in  
603 accumulation of intracellular glycerol. Integrating feedback control would assure perfect  
604 adaptation of stress responses, water balance and steady state viability. Note that the  
605 persistence of dead cells over the course of the experiment precludes 100% recovery.

606

607 **Figure 2. Signaling behaviors predict the survival and fitness of older cultures in severe**  
608 **osmotic stress.**

- 609 A. Strains classified by mean cluster (MC0 – MC5) and ranked top (1) to bottom (50)  
610 according to changes in *GPD1::GFP* accumulation over time (see Table S2 and methods).  
611 Each time point shows representative distributions of *GPD1::GFP* accumulation (green)  
612 and relative survival red (99.7% viability) to blue (11.7% viability). Cells above the 89<sup>th</sup>  
613 percentile (top 11%) are shown in black. Prior to osmotic challenge steady-state viabilities  
614 were uniformly high (range 93.0 – 99.6%; mean 98.2%). Rank-ordered mean clusters are  
615 topographically equivalent to a sequential ordering.
- 616 B. Relative viability of post-diauxic cultures (WXXX.BY01 controls) incubated in 3 M KCl  
617 before plating on iso-osmolar media. Cultures were re-ordered according to the ranked  
618 signaling behavior given in Figure 2A. The same experiment as originally plated is shown



619 in Figure S1. Strains color coded as in Figure 1C for comparison of exponential and post  
620 diauxic cultures.

621

622 **Figure 3. Extreme cautious and reckless cell types observed in post diauxic cultures**  
623 **produce observed variation in cautious to reckless signaling strategies in a simple bet**  
624 **hedging model.**

625 a. Cells with the most aggressive signaling began to die after long periods in severe stress  
626 leaving increasing fraction of cells with lower *GPD1::GFP* accumulations. Shown are  
627 distributions of accumulated *GPD1::GFP* and viability in replicate cultures of W242 (rank  
628 49) after 168 hours in 2.5 M KCl. Mean ( $\bar{x}$ ), standard deviation (std), and weight ( $w$ ; the  
629 fraction of cells in each distribution) are given. Sum (red) shows the cumulative fit of the  
630 4 learned Gaussians.

631 b. Static viability of post diauxic cells of strain W027 exposed to 3 M in microfluidic  
632 chambers. Individual cell behaviors mirror population behaviors measured by flow  
633 cytometry – e.g longer lag periods and increased accumulations of *GPD1::GFP* with  
634 increasing osmotic stress. Colored traces indicate accumulated fluorescence in  
635 representative cells in 1.5 (green), 2.0 (blue), 2.5 (red) and 3.0 M KCl (yellow). Arrows  
636 indicate average time to the first cell division  $\pm$  standard deviations.

637 c. Generation of intermediate optima in simple 2-state bet hedging model with heritable  
638 production of cautious (static) and reckless cell types. Bet hedging strategy  $P$  was  
639 defined as the probability of cautious cells for  $0 \leq P \leq 1$ . Relative fitness was measured  
640 for all strategies after 10 generations in each environment. All nine possible  
641 environmental shifts are shown. Nine possible 2-state environmental shifts between three  
642 general osmotic stress environments were considered: permissive (E0; all cells grow  
643 equally well), restrictive (E1; reckless cells divide, cautious cells survive without dividing),  
644 and killing (E2; reckless cells die, cautious cells survive without cell division). Only in  
645 shifts from moderate to more severe (E1  $\rightarrow$  E2) do bet hedging, intermediate strategies ( $0$   
646  $< P < 1$ ) prevail. The optimum strategy  $P$  depends on the number of generations in the  
647 first moderate stress environment. Results were independent of the number of  
648 generations in the first environment except as shown when E1 was the first environment.

649

650

651 **Figure S1. Monophasic signaling behavior of exponential cultures described well by**  
652 **mean *GPD1::GFP* accumulations at each time point.**

653 Mean ( $\bar{x}$ ), standard deviation (std), and weight ( $w$ ; the fraction of cells in each distribution) are  
654 given. Sum (red) shows the cumulative fit of the 4 learned Gaussians. The representative  
655 strains shown are color-coded as in Figure 1B.

656

657 **Figure S2. Static viability and survival of post diauxic cultures in extreme osmotic stress.**

658 Strains were incubated for up to 5 weeks in 3 M KCl plated on iso-osmolar media. A plate key  
659 is given in Table S3. The same data are shown sorted by rank in Figure 2B.

660

661 **Figure S3a–c. Reproducibility of cell distributions in strains with cautious to reckless**

662 **signaling.** Learned distributions of *GPD1::GFP* accumulation for post diauxic strains exposed  
663 to 2.5 M KCl for the times shown. Mean ( $\bar{x}$ ), standard deviation (std), and weight ( $w$ ; the  
664 fraction of cells in each distribution) are given. Sum (red) shows the cumulative fit of the 4  
665 learned Gaussians. The representative strains shown are color-coded as in Figure 1B.

666

667 **Figure S4. Rank predicts increasingly aggressive osmotic stress signaling.** Rank

668 predicts the relative proportion of cells above a threshold set at the top 11% of accumulation of  
669 *GPD1::GFP* in post diauxic cultures exposed to 2.5 M KCl for the times shown. Mean clusters  
670 are indicated with increasingly lighter grey scale in order of signaling (MC0, MC1, MC3, MC2,  
671 MC5, MC4).

672

673 **Figure S5. Mean clusters were differentiated for predicts viability of post diauxic cultures.**

674 Mean cluster predicted viability. Shown are average viabilities each mean cluster were  
675 analyzed by ANOVA or where appropriate by Welch's ANOVA at each time. Asterisks indicate  
676 significance at the  $\leq 0.05$  level. Decreasing mean viabilities at each time are indicated  
677 (horizontal lines).

678
